# Supplementary material for: Highly multiplexed fluorescence microscopy with spectrally tunable semiconducting polymer dots
Source: PubMed Central journal article supplement — Sci Adv. 2024 Dec 11;10(50):eadk8829. doi: 10.1126/sciadv.adk8829 (PMC11633751; doi:10.1126/sciadv.adk8829), 2024-12-11
Supplement: sciadv.adk8829_sm.pdf [file sciadv.adk8829_sm.pdf]

Supplementary Materials for  
**Highly multiplexed fluorescence microscopy with spectrally tunable  
semiconducting polymer dots**

Ziyu Guo *et al.*

Corresponding author: Daniel T. Chiu, [chiu@uw.edu](mailto:chiu@uw.edu); Joshua C. Vaughan, [jcv2@uw.edu](mailto:jcv2@uw.edu)

*Sci. Adv.* **10**, eadk8829 (2024)  
DOI: 10.1126/sciadv.adk8829

**This PDF file includes:**

Supplementary Text  
Figs. S1 to S13  
Tables S1 to S4

## Supplementary Text on linear unmixing:

Mixed signals in spectral multiplexing experiments arise when two or more signals are detected within a single channel as a result of spectral crosstalk. In linear algebra terms, this can be written as equation (S1) where the mixed signals are a matrix multiplication between the crosstalk / calibration matrix and the “unmixed” or true signal.

$$\text{Mixed} = \text{CM} \times \text{Unmixed} \quad (\text{S1})$$

Using linear unmixing, the “unmixed” images can be calculated using equation (S2) when the “mixed” images and the “calibration matrix” are known. It is a simple matrix multiplication between the inverse calibration matrix and the mixed images.

$$\text{Unmixed} = \text{CM}^{-1} \times \text{Mixed} \quad (\text{S2})$$

As an example, let us take the context of emission multiplexing as shown in Figure 2 or Figure S3. According to equation (S2), an 8-channel unmixed image [8×1 dimensions] can be generated by the matrix multiplication of the inverse calibration matrix [ $\text{CM}^{-1}$ , 8×8 dimensions] with the 8-channel mixed image [8×1 dimensions].

For the average signal in the images in Figure S3, equation (S1) looks like the following in visual and in tabular form:

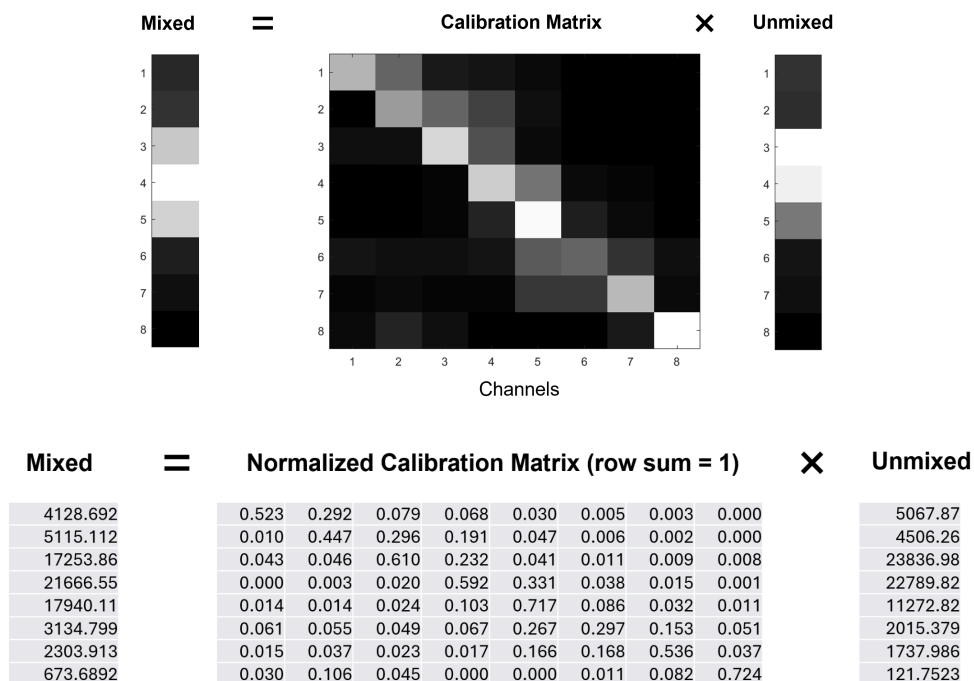

According to the calibration matrix, 52.3% of the total signal of the first Pdot lands in its own channel, 29.2% of the signal lands in the next channel, and so on. Note that the unmixed signal intensities have changed in subtle ways in comparison to the mixed signals. These changes are much more obvious when unmixing one or two pure stains in solution. We tested our method on solutions of pure stains and simple combinations of pure stains and we were able to unmix the

signals with >99% accuracy: less than 1% of the signal was misassigned. Our actual unmixing software routine, which is provided on GitHub and Zenodo together with sample data (see main text, Data and materials availability), uses a small variation on the above procedure that ensures the returned unmixed signals lack negative components which would be unphysical.

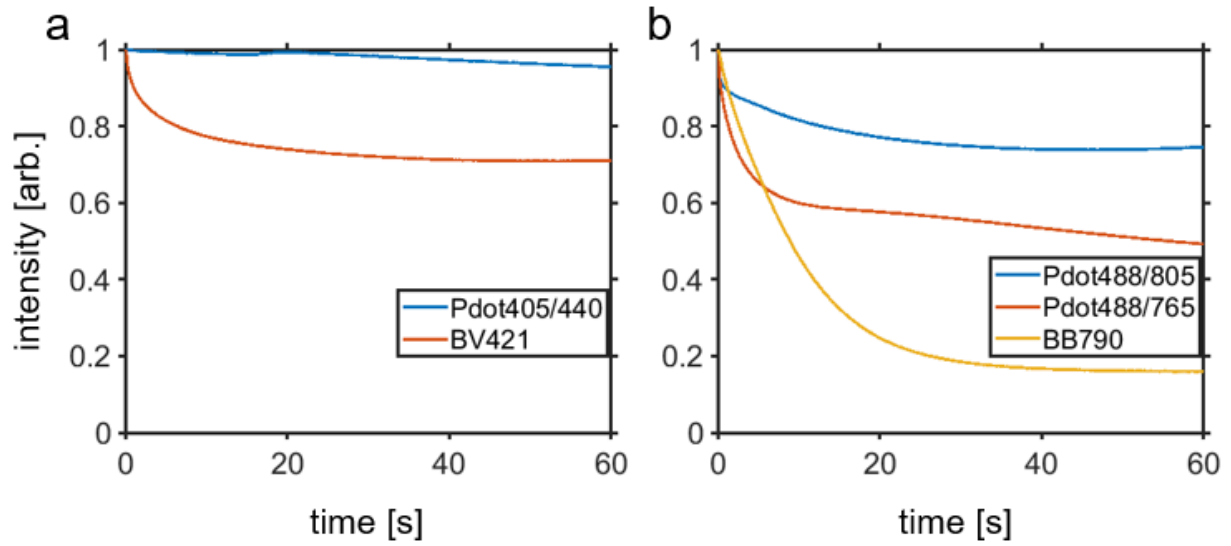

**Fig. S1. Comparing the photostability of Pdots against other dyes commonly used in flow cytometry.** (a) Comparison of the photostability of Pdot405/440 and Brilliant Violet 421, both excited at 405 nm ( $N=1$ ). (b) Comparison of the photostability of the long Stokes-shift probes Pdot488/765, Pdot488/805, and BB790, all excited at 488 nm ( $N=1$ ). All probes were illuminated at intensities comparable to that used for imaging.

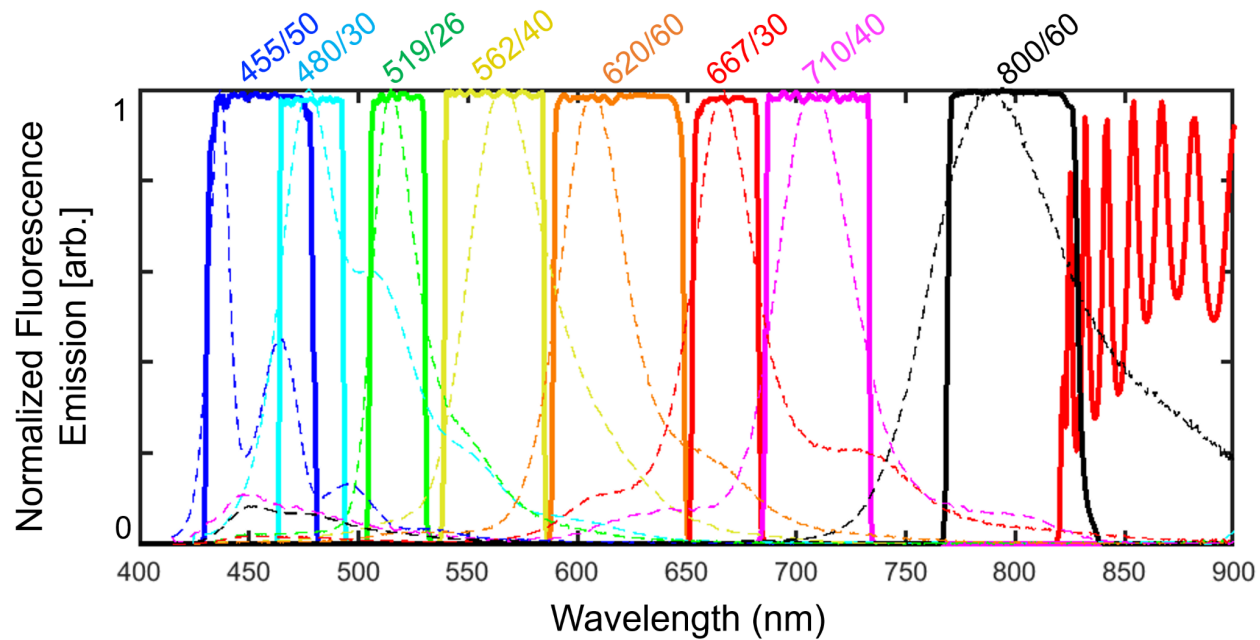

**Fig. S2. Emission spectra and associated filters overlay.** Emission spectra of eight 405-excited Pdots (dashed lines) along with the associated dichroic filter reflectance (red oscillating line above 825 nm) and emission filter transmission (solid colored lines).

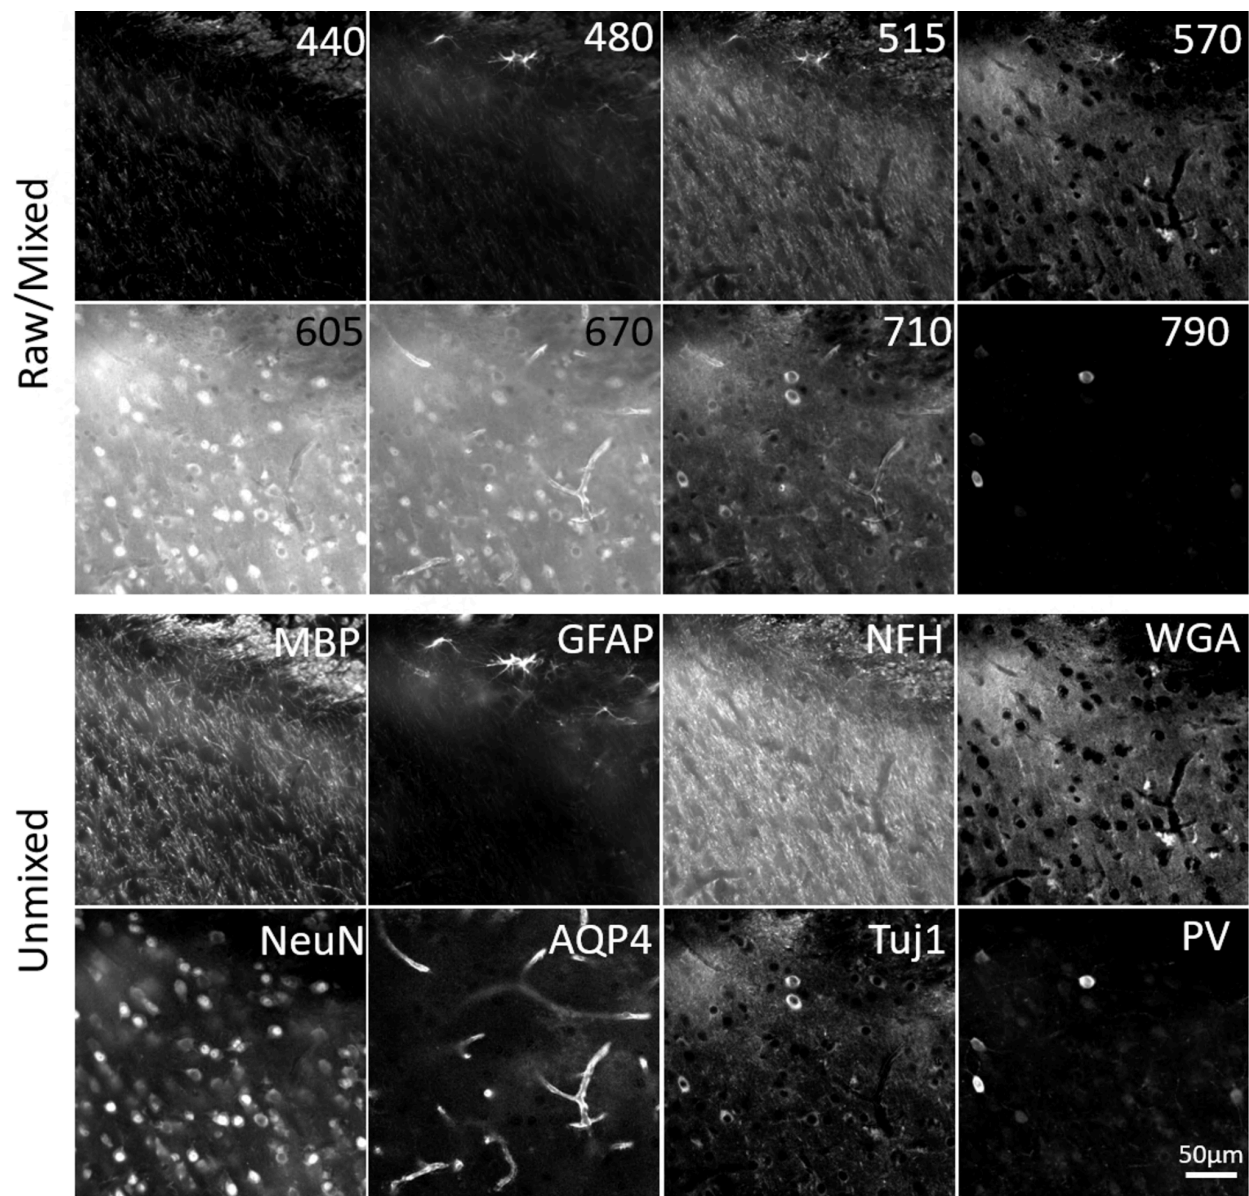

**Fig. S3. Raw and processed image comparison for the data set shown in Fig. 2.** Comparison of raw (mixed) images acquired at different emission wavelengths and the processed (unmixed) images that correspond to the primary antibody targets in mouse brain tissue, imaged at the amygdalar and piriform area.

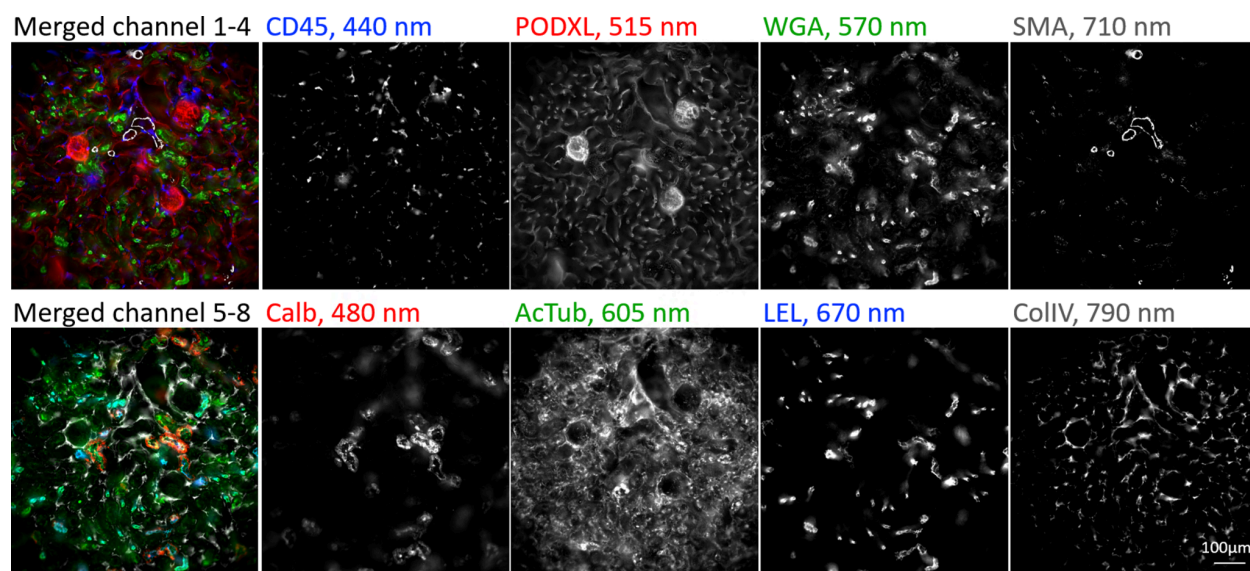

**Fig. S4. Eight-channel emission multiplexing in the mouse kidney.** Unmixed images from indirect immunostaining of a 50  $\mu\text{m}$  kidney slice using eight 405 nm-excited Pdot conjugates and imaged at the cortex region of the kidney.

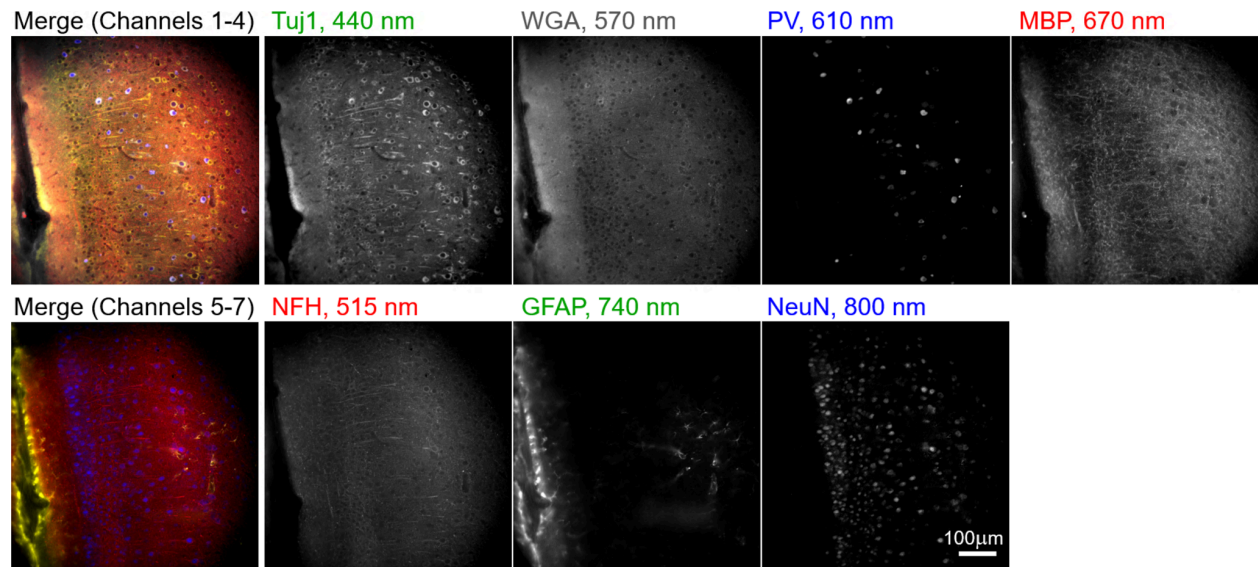

**Fig. S5. Seven-channel emission multiplexing in the mouse brain.** Unmixed images from indirect immunofluorescence staining of a 100  $\mu\text{m}$  thick mouse brain slice using seven 355 nm-excited Pdot conjugates and imaged at the anterior cingulate area of the brain.



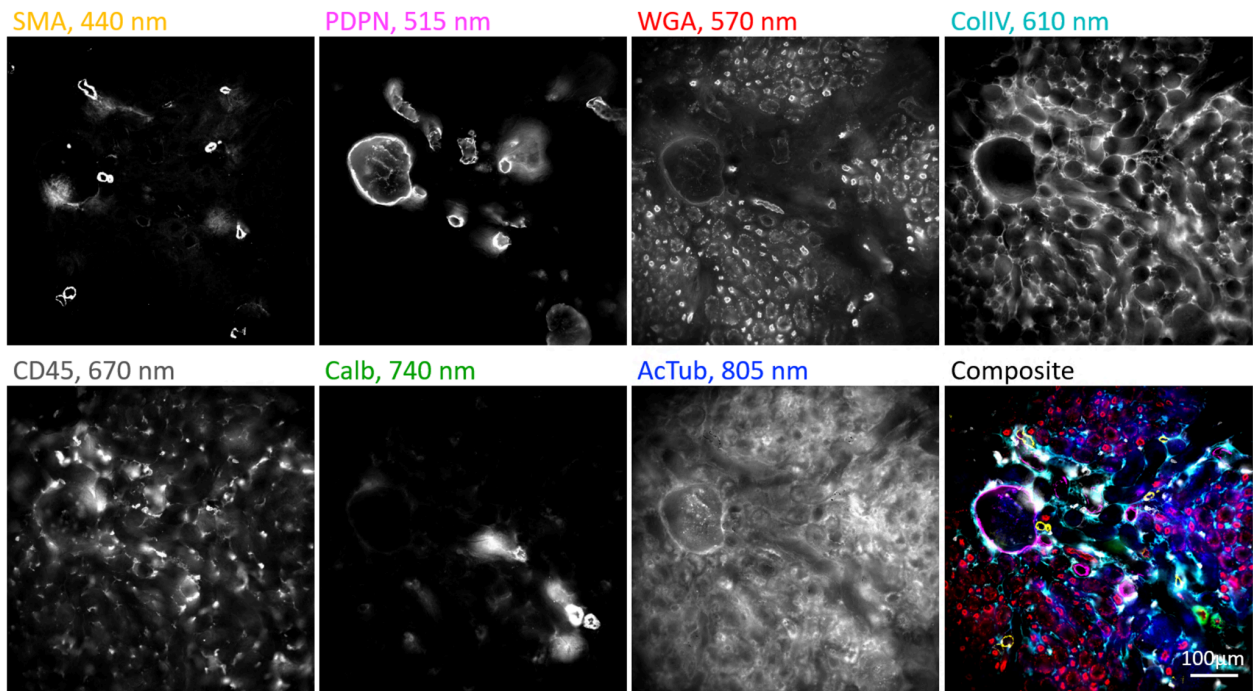

**Fig S6. Seven-channel emission multiplexing in the mouse kidney.** Unmixed images from indirect immunostaining of a 50  $\mu\text{m}$  kidney slice using seven 355 nm-excited Pdot conjugates and imaged at the cortex region of the kidney.

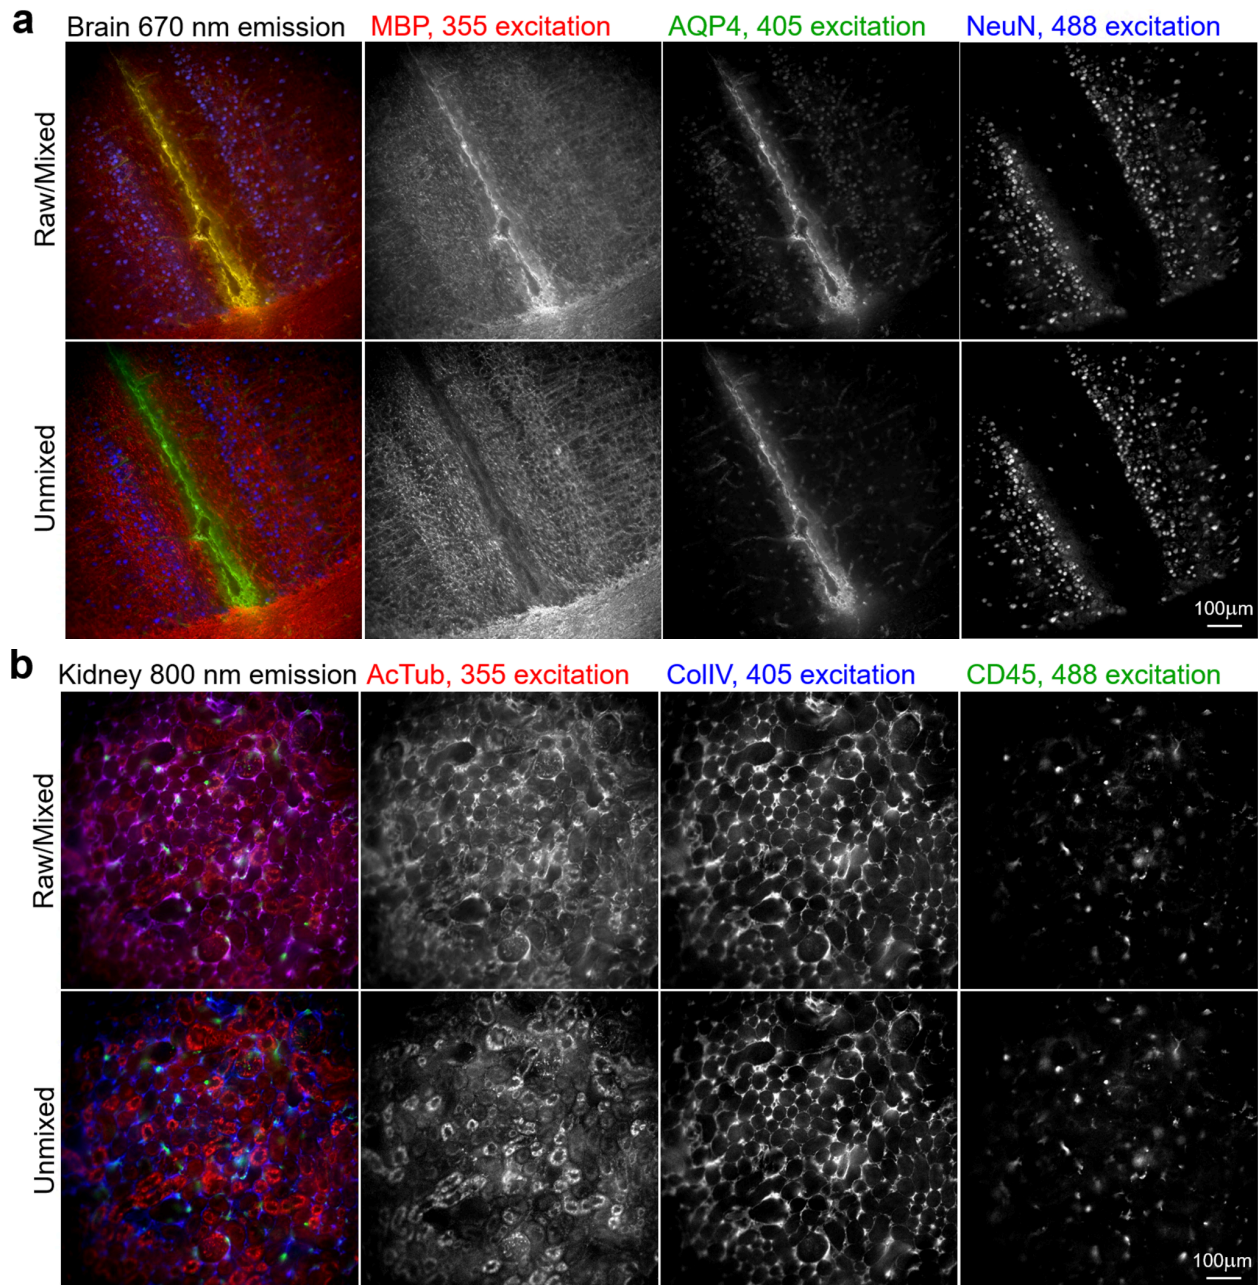

**Fig. S7. Three-channel excitation multiplexing in the mouse brain and mouse kidney.** A comparison of mixed (rows 1,3) and linearly unmixed (row 2,4) images for the data set shown in Fig. 3. (a): A 100  $\mu\text{m}$  thick mouse brain slice was stained using three Pdots with different excitation maxima. The brain section was imaged above the medial corpus callosum region and emission was collected with the same emission filter for all three channels. (b): A 100  $\mu\text{m}$  thick mouse kidney slice was stained using three Pdots with different excitation maxima. The kidney section was imaged at the cortex region and emission was collected with the same emission filter for all three channels.

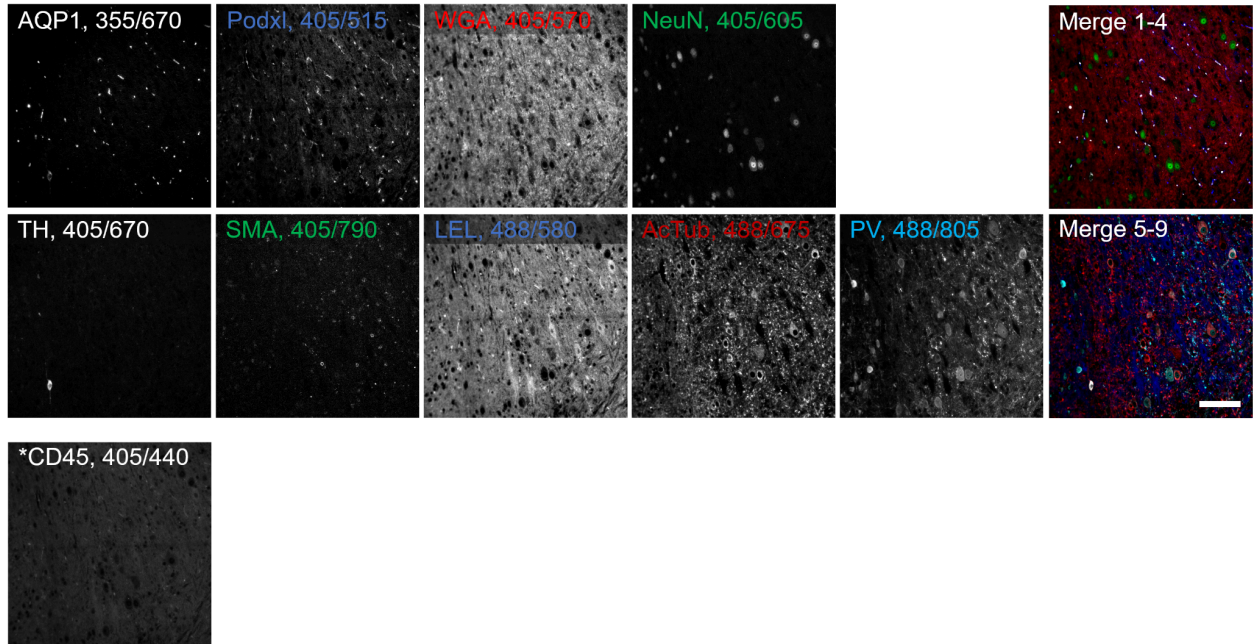

**Fig. S8. 10-channel Pdot staining of mouse cerebellum FFPE tissue.** The images in the five columns to the left show grayscale images for individual molecular targets in the mouse cerebellum. The rightmost column shows 4-channel composite images of the same tissue region. CD45, shown with an asterisk (\*) in the bottom row, is not expressed in this region of the brain. The scale bar is 100  $\mu$ m. Labels indicate the protein targets or lectins together with Pdot excitation/emission wavelengths. (AQP1 = aquaporin 1, PODXL = podocalyxin, WGA = wheat germ agglutinin lectin, NeuN = neuronal nuclei, TH = tyrosine hydroxylase, SMA = alpha-smooth muscle actin, LEL = lycopersicon esculentum tomato lectin, AcTub = acetylated tubulin, PV = parvalbumin, CD45 = leukocyte common antigen).

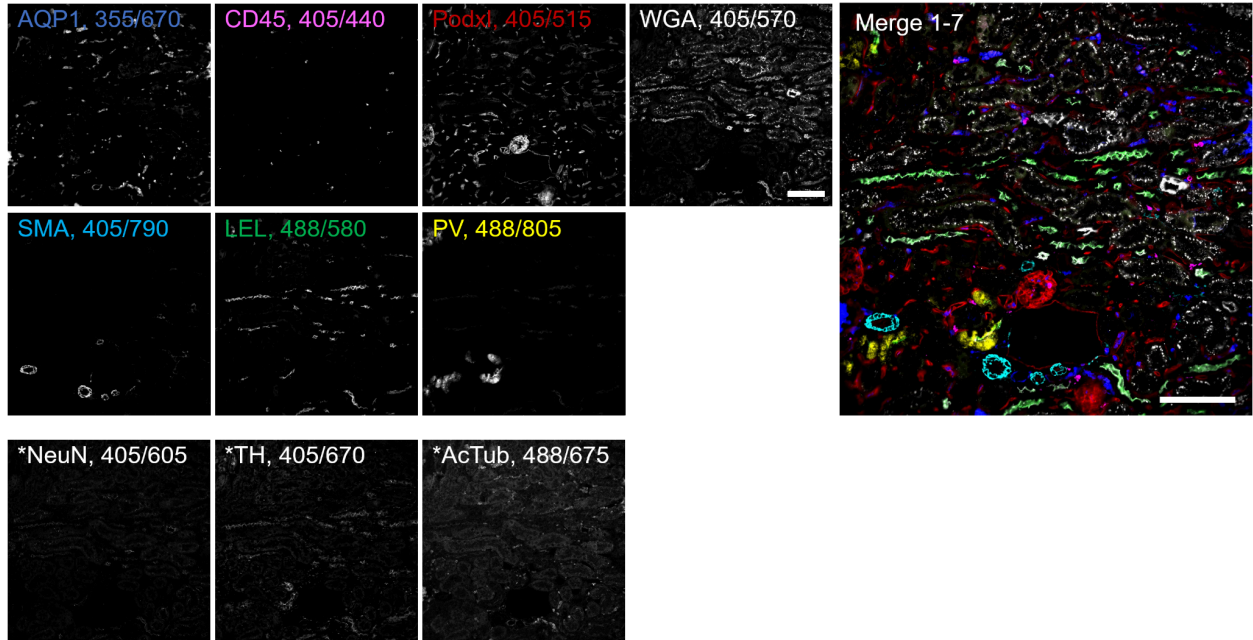

**Fig. S9. 10-channel Pdot staining of mouse kidney FFPE tissue.** The images in the four columns to the left show grayscale images for individual molecular targets in the mouse kidney. The rightmost column shows a 7-channel composite image of the same tissue region. NeuN, TH, and AcTub, shown with an asterisk (\*) in the bottom row, were either not expressed in the kidney or showed very low levels of staining in this specimen. All scale bars are 100  $\mu$ m. Labels indicate the protein targets or lectins together with Pdot excitation/emission wavelengths. (AQP1 = aquaporin 1, PODXL = podocalyxin, WGA = wheat germ agglutinin lectin, NeuN = neuronal nuclei, TH = tyrosine hydroxylase, SMA = alpha-smooth muscle actin, LEL = lycopersicon esculentum tomato lectin, AcTub = acetylated tubulin, PV = parvalbumin, CD45 = leukocyte common antigen).

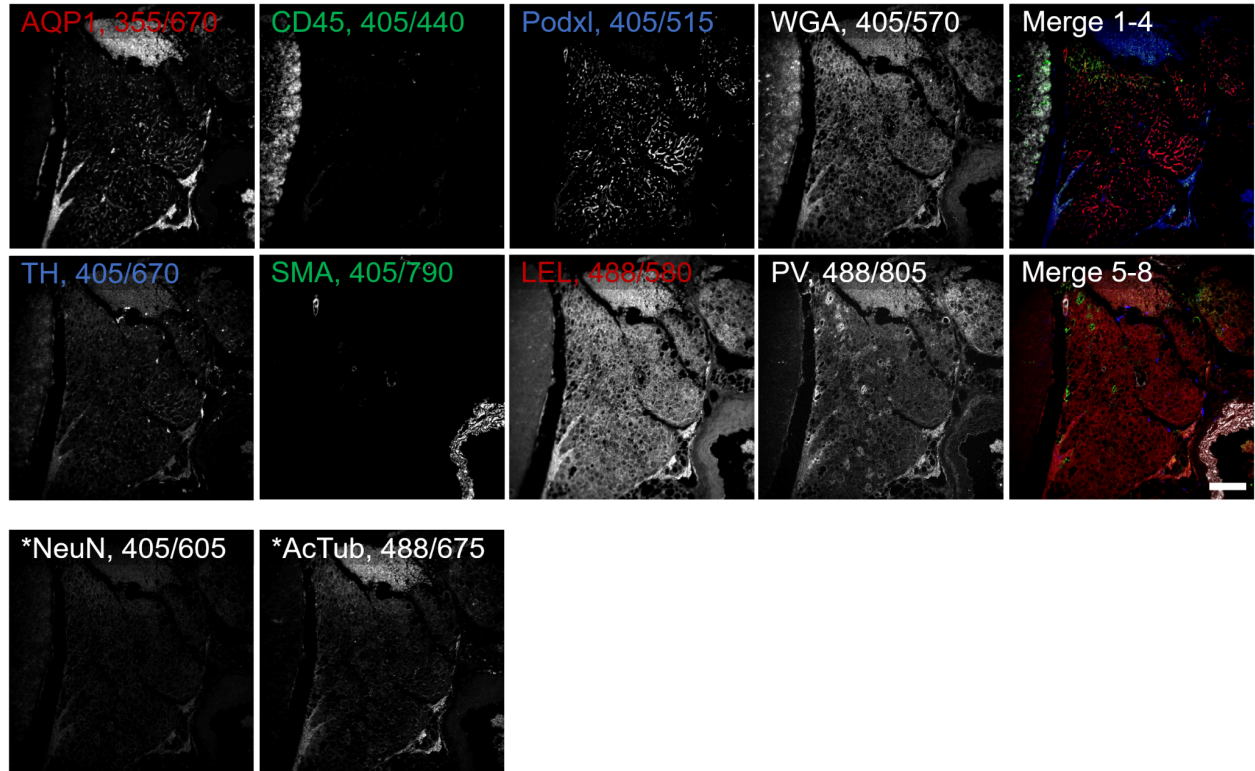

**Fig. S10. 10-channel Pdot staining of mouse thymus FFPE tissue.** The images in the four columns to the left show grayscale images for individual molecular targets in the mouse thymus. The rightmost column shows 4-channel composite images of the same tissue region. NeuN and AcTub, shown with asterisks (\*) in the bottom row, were either not expressed in the thymus or showed very low levels of staining in this specimen. The scale bar is 100  $\mu$ m. Labels indicate the protein targets or lectins together with Pdot excitation/emission wavelengths. (AQP1 = aquaporin 1, PODXL = podocalyxin, WGA = wheat germ agglutinin lectin, NeuN = neuronal nuclei, TH = tyrosine hydroxylase, SMA = alpha-smooth muscle actin, LEL = lycopersicon esculentum tomato lectin, AcTub = acetylated tubulin, PV = parvalbumin, CD45 = leukocyte common antigen).

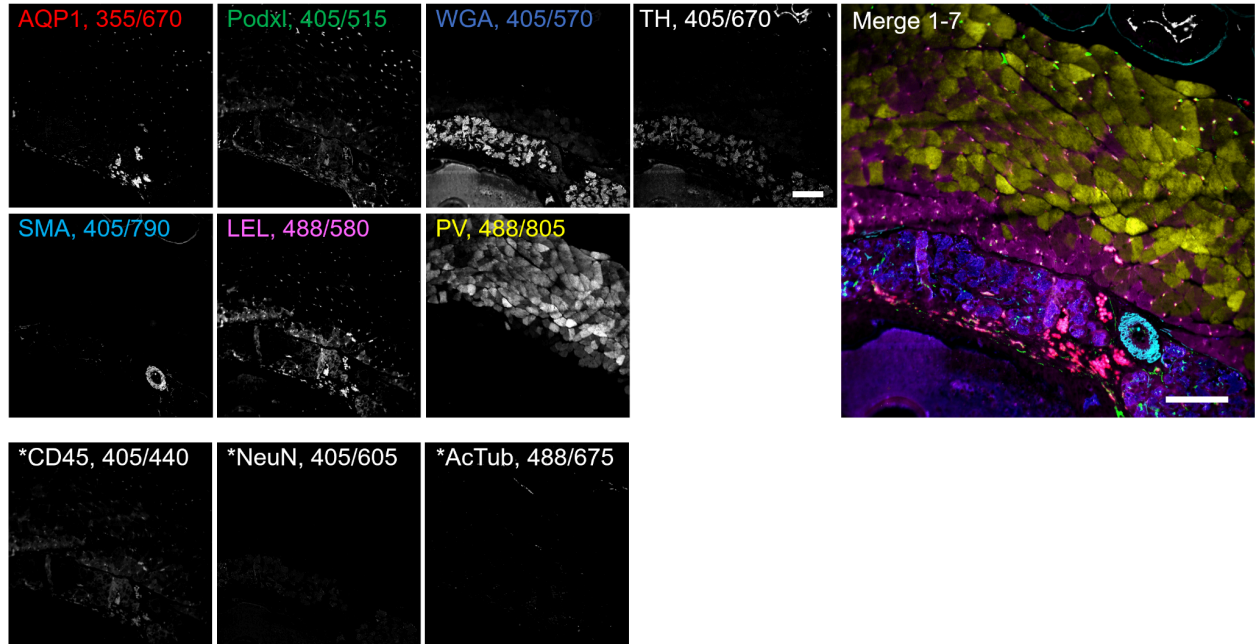

**Fig. S11. 10-channel Pdot staining of mouse prostate FFPE tissue.** The images in the four columns to the left show grayscale images for individual molecular targets in the mouse prostate. The rightmost column shows a 7-channel composite image of the same tissue region. CD45, NeuN, and AcTub, shown with asterisks (\*) in the bottom row, were either not expressed in the prostate or showed very low levels of staining in this specimen. All scale bars are 100  $\mu$ m. Labels indicate the protein targets or lectins together with Pdot excitation/emission wavelengths. (AQP1 = aquaporin 1, PODXL = podocalyxin, WGA = wheat germ agglutinin lectin, NeuN = neuronal nuclei, TH = tyrosine hydroxylase, SMA = alpha-smooth muscle actin, LEL = lycopersicon esculentum tomato lectin, AcTub = acetylated tubulin, PV = parvalbumin, CD45 = leukocyte common antigen).

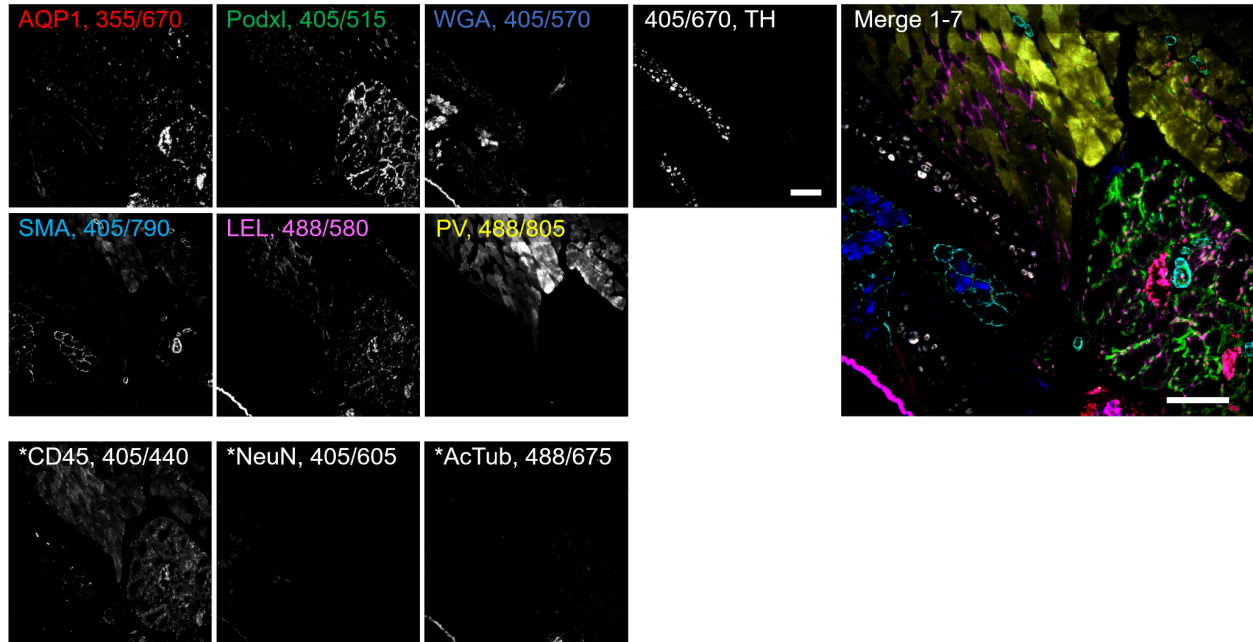

**Fig. S12. 10-channel Pdot staining of mouse larynx FFPE tissue.** The images in the four columns to the left show grayscale images for individual molecular targets in the mouse larynx. The rightmost column shows a 7-channel composite image of the same tissue region. CD45, NeuN, and AcTub, shown with asterisks (\*) in the bottom row, were either not expressed in the larynx or showed very low levels of staining in this specimen. All scale bars are 100  $\mu$ m. Labels indicate the protein targets or lectins together with Pdot excitation/emission wavelengths. (AQP1 = aquaporin 1, PODXL = podocalyxin, WGA = wheat germ agglutinin lectin, NeuN = neuronal nuclei, TH = tyrosine hydroxylase, SMA = alpha-smooth muscle actin, LEL = lycopersicon esculentum tomato lectin, AcTub = acetylated tubulin, PV = parvalbumin, CD45 = leukocyte common antigen).

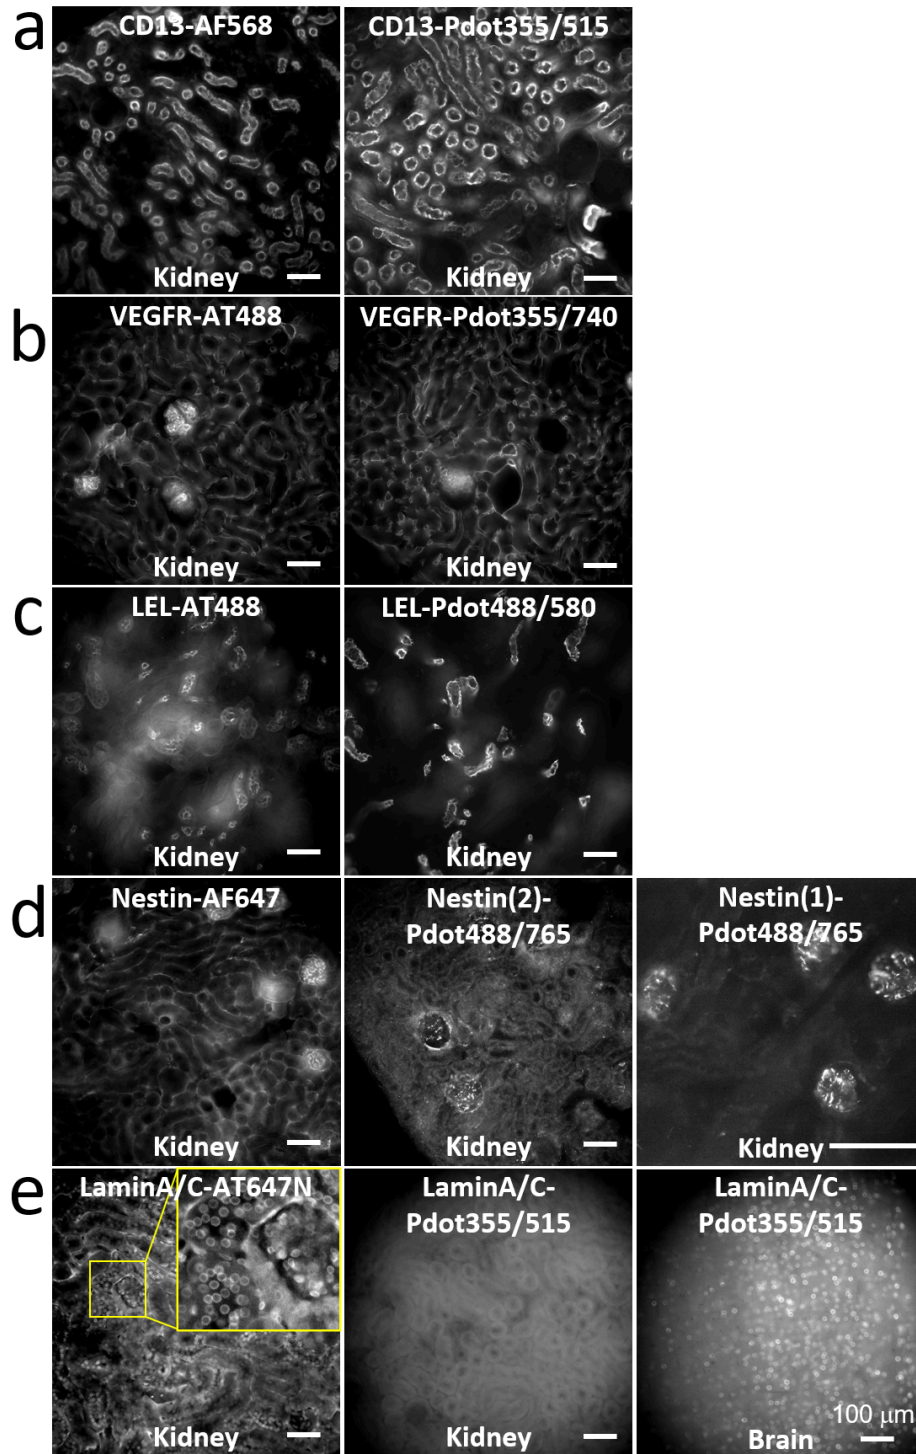

**Fig. S13. Methodology for validation of Pdot-antibody conjugates.** Kidney and brain tissue sections were stained for a single molecular target using direct or indirect immunostaining. The left column shows the results of staining using antibodies conjugated with conventional small molecule dyes. The right column shows the results of staining using antibodies conjugated with Pdots. Rows (a-c) showed the correct staining pattern using antibody-Pdot conjugates or lectin-Pdot conjugates. In row (d), Nestin(2) antibody, when conjugated to Pdot488/765, showed



partial loss of antigenicity or weak staining. When the Pdot conjugation was repeated with another Nestin antibody (Nestin(1)), it showed the correct staining pattern. In row (e), the LaminA/C antibody conjugated to Pdot355/515 showed little to no stain in the kidney but showed good nuclear stain in brain tissue. This difference in staining between kidney and brain may result from either a greater abundance of the protein in brain vs kidney tissue (relative to the background signal for each) or from different efficiencies of binding of the antibody to the relevant lamin a/c splice isoforms in brain and kidney.

- (a) Rat anti-CD13 + Donkey anti-Rat AF568 (left); Rat anti-CD13, Pdot355/515 (right)
- (b) Rat anti-VEGFR + Donkey anti-Rat AT488 (left); Rat anti-VEGFR, Pdot355/740 (right)
- (c) LEL-AT488 (left); LEL-Pdot488/580 (right)
- (d) Mouse IgG1 Nestin + Goat anti-mouse AF647 (left); mouse IgG1 Nestin(2), Pdot488/765 ; mouse IgG2a Nestin(1), Pdot488/765.
- (e) Rabbit Lamin A/C + Donkey anti-Rabbit AT647N; Rabbit Lamin A/C, Pdot355/515.

**Table S1. Summary of sample labeling and imaging setup.** All experiments (except for Figure S13) used a Ti2-E Nikon microscope, exposure time of 100 ms for fresh-cut tissues, 1000 ms for FFPE tissues, 20x objective lens, SOLA light engine, ORCA Flash 4.0 camera, immunostaining procedure, and 20–24 hour incubation time; secondary antibodies are all from Jackson ImmunoResearch. More details are provided in the Methods section.

| Fig. Tissue Thickness                        | Primary Antibody                                                                                                                                                                                                                                                                                                                                                                                                                             | Secondary Antibody                                                                                                                                                                                                                                                    | Filter Combinations                                                                                                                                                                                                                                                                                                                                                                                                                                                                              |                                                                                                                                                                                                                                                                                                                                                                            |                                                                                                                                                                                                                                                                                                               |
|----------------------------------------------|----------------------------------------------------------------------------------------------------------------------------------------------------------------------------------------------------------------------------------------------------------------------------------------------------------------------------------------------------------------------------------------------------------------------------------------------|-----------------------------------------------------------------------------------------------------------------------------------------------------------------------------------------------------------------------------------------------------------------------|--------------------------------------------------------------------------------------------------------------------------------------------------------------------------------------------------------------------------------------------------------------------------------------------------------------------------------------------------------------------------------------------------------------------------------------------------------------------------------------------------|----------------------------------------------------------------------------------------------------------------------------------------------------------------------------------------------------------------------------------------------------------------------------------------------------------------------------------------------------------------------------|---------------------------------------------------------------------------------------------------------------------------------------------------------------------------------------------------------------------------------------------------------------------------------------------------------------|
| 2, S3<br>Brain (Mouse 1)<br>100 µm section   | MBP<br>GFAP<br>NFH<br>WGA<br>NeuN<br>AQP4<br>Tuj1<br>PV                                                                                                                                                                                                                                                                                                                                                                                      | Pdot405/440 Donkey anti-Rat<br>Pdot405/480 Donkey anti-Mouse IgG1<br>Pdot405/515 Goat anti-Chicken<br>Pdot405/570 WGA<br>Pdot405/605 Goat anti-Mouse IgG2b<br>Pdot405/670 Goat anti-Mouse IgG3<br>Pdot405/710 Goat anti-Mouse IgG2a<br>Pdot405/790 Donkey anti-Rabbit | <i>Dichroic:</i><br>DI02-R405-25X36<br>Same for all                                                                                                                                                                                                                                                                                                                                                                                                                                              | <i>Excitation filter:</i><br>zet405/20x<br>Same for all                                                                                                                                                                                                                                                                                                                    | <i>Emission filters:</i><br>ET455/50m<br>ET480/30m<br>ET519/26m<br>FF01-562/40<br>ET620/60m<br>ET667/30m<br>FF01-710/40<br>ET800/60                                                                                                                                                                           |
| 3A, S7<br>Brain (Mouse 1)<br>100 µm section  | MBP<br>AQP4<br>NeuN                                                                                                                                                                                                                                                                                                                                                                                                                          | Pdot355/670 Donkey anti-Rat<br>Pdot405/670 Goat anti-Mouse IgG3<br>Pdot488/675 Goat anti-Mouse IgG2b                                                                                                                                                                  | <i>Dichroics:</i><br>FF376-DI01-25X36<br>DI02-R405-25X36<br>DI02-R488-25X36                                                                                                                                                                                                                                                                                                                                                                                                                      | <i>Excitation filters:</i><br>zet365/20x<br>zet405/20x<br>zet488/10x                                                                                                                                                                                                                                                                                                       | <i>Emission filter:</i><br>ET667/30m<br>ET667/30m<br>ET667/30m                                                                                                                                                                                                                                                |
| 3B, S7<br>Kidney (Mouse 1)<br>100 µm section | AcTub<br>ColIV<br>CD45                                                                                                                                                                                                                                                                                                                                                                                                                       | Pdot355/800 Goat anti-Mouse IgG2b<br>Pdot405/790 Donkey anti-Rabbit<br>Pdot488/805 Donkey anti-Rat                                                                                                                                                                    | <i>Dichroics:</i><br>FF376-DI01-25X36<br>DI02-R405-25X36<br>DI02-R488-25X36                                                                                                                                                                                                                                                                                                                                                                                                                      | <i>Excitation filters:</i><br>zet365/20x<br>zet405/20x<br>zet488/10x                                                                                                                                                                                                                                                                                                       | <i>Emission filter:</i><br>ET800/60<br>ET800/60<br>ET800/60                                                                                                                                                                                                                                                   |
| 4<br>Brain (Mouse 3)<br>50 µm section        | Pdot355/400 SOX2 (1)<br>Pdot355/515 LMNA/C (1)<br>Pdot355/570 MAP2<br>Pdot355/740 VEGFR3 (1)<br>Pdot405/440 GFAB<br>Pdot405/570 WGA<br>Pdot405/605 NeuN<br>Pdot405/670 TH<br>Pdot405/710 PV<br>Pdot405/790 MBP<br>Pdot488/515 Calb (1)<br>Pdot488/610 NFH<br>Pdot488/675 Tuj1<br>Pdot488/765 Nes                                                                                                                                             | All primary conjugates, no secondaries necessary                                                                                                                                                                                                                      | <i>Dichroics:</i><br>FF376-DI01-25X36<br>FF376-DI01-25X36<br>FF376-DI01-25X36<br>FF376-DI01-25X36<br>DI02-R405-25X36<br>DI02-R405-25X36<br>DI02-R405-25X36<br>DI02-R405-25X36<br>DI02-R405-25X36<br>DI02-R405-25X36<br>DI02-R405-25X36<br>DI02-R405-25X36<br>DI02-R488-25X36<br>DI02-R488-25X36<br>DI02-R488-25X36<br>DI02-R488-25X36                                                                                                                                                            | <i>Excitation filters:</i><br>zet365/20x<br>zet365/20x<br>zet365/20x<br>zet365/20x<br>zet405/20x<br>zet405/20x<br>zet405/20x<br>zet405/20x<br>zet405/20x<br>zet405/20x<br>zet405/20x<br>zet405/20x<br>zet488/10x<br>zet488/10x<br>zet488/10x<br>zet488/10x                                                                                                                 | <i>Emission filters:</i><br>ET405/30m<br>ET519/26m<br>FF01-562/40<br>ET740/40x<br>ET455/50m<br>FF01-562/40<br>ET620/60m<br>FF01-710/40<br>ET800/60<br>ET519/26m<br>ET620/60m<br>ET667/30m<br>ET760/40                                                                                                         |
| 5<br>Kidney (Mouse 2)<br>50 µm section       | Pdot355/440 PNA<br>Pdot355/515 CD13<br>Pdot355/570 AQP2<br>Pdot355/610 ITGA8<br>Pdot355/670 AQP1<br>Pdot355/740 VEGFR3 (1)<br>Pdot355/800 UMOD<br>Pdot405/440 CD45<br>Pdot405/480 Megalin<br>Pdot405/515 PODXL<br>Pdot405/570 WGA<br>Pdot405/605 ColIV<br>Pdot405/670 LEL<br>Pdot405/710 Agrin<br>Pdot405/790 α-SMA<br>Pdot488/515 Calb (1)<br>Pdot488/580 PDPL<br>Pdot488/610 REN<br>Pdot488/675 AcTub<br>Pdot488/765 Nes<br>Pdot488/805 PV | All primary conjugates, no secondaries necessary                                                                                                                                                                                                                      | <i>Dichroics:</i><br>FF376-DI01-25X36<br>FF376-DI01-25X36<br>FF376-DI01-25X36<br>FF376-DI01-25X36<br>FF376-DI01-25X36<br>FF376-DI01-25X36<br>FF376-DI01-25X36<br>DI02-R405-25X36<br>DI02-R405-25X36<br>DI02-R405-25X36<br>DI02-R405-25X36<br>DI02-R405-25X36<br>DI02-R405-25X36<br>DI02-R405-25X36<br>DI02-R405-25X36<br>DI02-R405-25X36<br>DI02-R405-25X36<br>DI02-R405-25X36<br>DI02-R488-25X36<br>DI02-R488-25X36<br>DI02-R488-25X36<br>DI02-R488-25X36<br>DI02-R488-25X36<br>DI02-R488-25X36 | <i>Excitation filters:</i><br>zet365/20x<br>zet365/20x<br>zet365/20x<br>zet365/20x<br>zet365/20x<br>zet365/20x<br>zet365/20x<br>zet405/20x<br>zet405/20x<br>zet405/20x<br>zet405/20x<br>zet405/20x<br>zet405/20x<br>zet405/20x<br>zet405/20x<br>zet405/20x<br>zet405/20x<br>zet405/20x<br>zet405/20x<br>zet488/10x<br>zet488/10x<br>zet488/10x<br>zet488/10x<br>zet488/10x | <i>Emission filters:</i><br>ET455/50m<br>ET519/26m<br>FF01-562/40<br>ET620/60m<br>ET667/30m<br>ET740/40x<br>ET800/60<br>ET455/50m<br>ET480/30m<br>ET519/26m<br>FF01-562/40<br>ET620/60m<br>ET667/30m<br>FF01-710/40<br>ET800/60<br>ET519/26m<br>FF01-562/40<br>ET620/60m<br>ET667/30m<br>ET760/40<br>ET800/60 |
| S4<br>Kidney (Mouse 2)<br>50 µm section      | CD45<br>Calb<br>PODXL<br>WGA<br>AcTub<br>LEL<br>α-SMA<br>ColIV                                                                                                                                                                                                                                                                                                                                                                               | Pdot405/440 Donkey anti-Rat<br>Pdot405/480 Donkey anti-Mouse IgG1<br>Pdot405/515 PODXL<br>Pdot405/570 WGA<br>Pdot405/605 Goat anti-Mouse IgG2b<br>Pdot405/670 LEL<br>Pdot405/710 Goat anti-Mouse IgG2a<br>Pdot405/790 Donkey anti-Rabbit                              | <i>Dichroic:</i><br>DI02-R405-25X36<br>Same for all                                                                                                                                                                                                                                                                                                                                                                                                                                              | <i>Excitation filter:</i><br>zet405/20x<br>Same for all                                                                                                                                                                                                                                                                                                                    | <i>Emission filters:</i><br>ET455/50m<br>ET480/30m<br>ET519/26m<br>FF01-562/40<br>ET620/60m<br>ET667/30m<br>FF01-710/40<br>ET800/60                                                                                                                                                                           |

|                                                       |                                                                                                                                                                                                   |                                                                                                                                                                                                                                   |                                                                                                                                                                                                                                                                                    |                                                                                                                                                                                                     |                                                                                                                                                                         |
|-------------------------------------------------------|---------------------------------------------------------------------------------------------------------------------------------------------------------------------------------------------------|-----------------------------------------------------------------------------------------------------------------------------------------------------------------------------------------------------------------------------------|------------------------------------------------------------------------------------------------------------------------------------------------------------------------------------------------------------------------------------------------------------------------------------|-----------------------------------------------------------------------------------------------------------------------------------------------------------------------------------------------------|-------------------------------------------------------------------------------------------------------------------------------------------------------------------------|
| S5<br>Brain (Mouse 1)<br>100 µm section               | Tuj1<br>NFH<br>WGA<br>PV<br>MBP<br>GFAB<br>NeuN                                                                                                                                                   | Pdot355/440 Goat anti-mouse IgG2a<br>Pdot355/515 Donkey anti-Chicken<br>Pdot355/570 WGA<br>Pdot355/610 Donkey anti-Rabbit<br>Pdot355/670 Donkey anti-Rat<br>Pdot355/740 Goat anti-Mouse IgG1<br>Pdot355/800 Goat anti-Mouse IgG2b | <i>Dichroics:</i><br>FF376-DI01-25X36<br>Same for all                                                                                                                                                                                                                              | <i>Excitation filters:</i><br>zet365/20x<br>Same for all                                                                                                                                            | <i>Emission filters:</i><br>ET455/50m<br>ET519/26m<br>FF01-562/40<br>ET620/60m<br>ET667/30m<br>ET740/40x<br>ET800/60                                                    |
| S6<br>Kidney (Mouse 2)<br>50 µm section               | α-SMA<br>PDPN<br>WGA<br>ColIV<br>CD45<br>Calb<br>AcTub                                                                                                                                            | Pdot355/440 Goat anti-mouse IgG2a<br>Pdot355/515 Donkey anti-Hamster<br>Pdot355/570 WGA<br>Pdot355/610 Donkey anti-Rabbit<br>Pdot355/670 Donkey anti-Rat<br>Pdot355/740 Goat anti-Mouse IgG1<br>Pdot355/800 Goat anti-Mouse IgG2b | <i>Dichroics:</i><br>FF376-DI01-25X36<br>Same for all                                                                                                                                                                                                                              | <i>Excitation filters:</i><br>zet365/20x<br>Same for all                                                                                                                                            | <i>Emission filters:</i><br>ET455/50m<br>ET519/26m<br>FF01-562/40<br>ET620/60m<br>ET667/30m<br>ET740/40x<br>ET800/60                                                    |
| S8-S12<br>Mouse Tissue<br>Microarray<br>5 µm section  | Pdot355/670 AQP1<br>Pdot405/440 CD45<br>Pdot405/515 PODXL<br>Pdot405/570 WGA<br>Pdot405/605 NeuN<br>Pdot405/670 TH<br>Pdot405/790 α-SMA<br>Pdot488/580 LEL<br>Pdot488/675 AcTub<br>Pdot488/805 PV | All primary conjugates, no secondaries<br>necessary                                                                                                                                                                               | <i>Dichroics:</i><br>FF376-DI01-25X36<br>DI02-R405-25X36<br>DI02-R405-25X36<br>DI02-R405-25X36<br>DI02-R405-25X36<br>DI02-R405-25X36<br>DI02-R405-25X36<br>DI02-R405-25X36<br>DI02-R488-25X36<br>DI02-R488-25X36<br>DI02-R488-25X36                                                | <i>Excitation filters:</i><br>zet365/20x<br>zet405/20x<br>zet405/20x<br>zet405/20x<br>zet405/20x<br>zet405/20x<br>zet405/20x<br>zet405/20x<br>zet488/10x<br>zet488/10x<br>zet488/10x                | <i>Emission filters:</i><br>ET667/30m<br>ET455/50m<br>ET519/26m<br>FF01-562/40<br>ET620/60m<br>ET667/30m<br>ET800/60<br>FF01-562/40<br>ET667/30m<br>ET800/60            |
| S13<br>Kidney and Brain<br>(Mouse 3)<br>50 µm section | CD13<br>Pdot355/515 CD13<br>VEGFR<br>Pdot355/740 VEGFR<br>AT488 LEL<br>Pdot488/580 LEL<br>Nestin<br>Pdot488/765 Nestin(2)<br>Pdot488/765 Nestin(1)<br>Lamin A/C<br>Pdot355/515 Lamin A/C          | AF568 Donkey anti-Rat<br>-<br>AT488 Donkey anti-Rat<br>-<br>-<br>-<br>AF647 Goat anti-mouse<br>-<br>-<br>AT647N Donkey anti-Rabbit<br>-                                                                                           | <i>Dichroics:</i><br>zt405/488/561/640rpc<br>v2-UF2<br>FF376-DI01-25X36<br>DI02-R488-25X36<br>FF376-DI01-25X36<br>DI02-R488-25X36<br>DI02-R488-25X36<br>zt405/488/561/640rpc<br>v2-UF2<br>DI02-R488-25X36<br>DI02-R488-25X36<br>zt405/488/561/640rpc<br>v2-UF2<br>FF376-DI01-25X36 | <i>Excitation filters:</i><br>- (LED control)<br>zet365/20x<br>zet488/10x<br>zet365/20x<br>zet488/10x<br>zet488/10x<br>- (LED control)<br>zet488/10x<br>zet488/10x<br>- (LED control)<br>zet365/20x | <i>Emission filters:</i><br>ET595/44m<br>ET667/30m<br>ET519/26m<br>ET740/40x<br>ET519/26m<br>FF01-562/40<br>ET700/75m<br>ET760/40<br>ET760/40<br>ET700/75m<br>ET519/26m |

**Table S2. Pdot-secondary antibody conjugates.**

|                | Primary Antibody or Lectin | Protein Target or Lectin              | Host               | Vendor                   | Catalog #   | Clonality            | Pdot Conjugated Secondary Antibody or Lectin | Catalog #   |
|----------------|----------------------------|---------------------------------------|--------------------|--------------------------|-------------|----------------------|----------------------------------------------|-------------|
| Brain - 355ex  | Tuj1/TUBB3                 | Tubulin $\beta$ 3                     | Mouse IgG2a        | BioLegend                | 801201      | monoclonal           | Pdot355/440 Goat anti-mouse IgG2a            | 115-005-206 |
|                | NFH                        | Neurofilament Heavy Chain             | Chicken            | Aves Labs                | NFH         |                      | Pdot355/515 Donkey anti-Chicken              | 703-005-155 |
|                | WGA                        | Wheat Germ Agglutinin                 |                    | Vector Labs              | L-1020      |                      | Pdot355/570 WGA                              | -           |
|                | PV                         | Parvalbumin                           | Rabbit             | Abcam                    | ab11427     | polyclonal           | Pdot355/610 Donkey anti-Rabbit               | 711-005-152 |
|                | MBP                        | Myelin Basic Protein                  | Rat                | Abcam                    | ab7349      | monoclonal           | Pdot355/670 Donkey anti-Rat                  | 715-005-151 |
|                | GFAP                       | Glial Fibrillary Acidic Protein       | Mouse IgG1         | Cell Signaling           | 3670S       | monoclonal           | Pdot355/740 Goat anti-mouse IgG1             | 115-005-205 |
|                | NeuN                       | Neuronal Nuclei                       | Mouse IgG2b        | Encor                    | MCA-1B7     | monoclonal           | Pdot355/800 Goat anti-mouse IgG2b            | 115-005-207 |
| Kidney - 355ex | $\alpha$ -SMA              | alpha-Smooth Muscle Actin             | Mouse IgG2a        | BioLegend                | 904601      | monoclonal (1A4)     | Pdot355/440 Goat anti-mouse IgG2a            | 115-005-206 |
|                | PDPN                       | Podoplanin                            | Syrian Hamster IgG | DSHB                     | 8.1.1-s     | monoclonal           | Pdot355/515 Donkey anti-Hamster              | Unavailable |
|                | WGA                        | Wheat Germ Agglutinin                 |                    | Vector Labs              | L-1020      |                      | Pdot355/570 WGA                              | -           |
|                | AQP1                       | Aquaporin 1                           | Rabbit             | Abcam                    | ab15080     | polyclonal           | Pdot355/610 Donkey anti-Rabbit               | 711-005-152 |
|                | CD45                       | Leukocyte Common Antigen              | Rat                | BioLegend                | 103101      | monoclonal (30-F11)  | Pdot355/670 Donkey anti-Rat                  | 715-005-151 |
|                | Calb                       | Calbindin                             | Mouse IgG1         | Abcam                    | ab82812     | monoclonal           | Pdot355/740 Goat anti-mouse IgG1             | 115-005-205 |
|                | AcTub                      | Acetylated Tubulin                    | Mouse IgG2b        | Sigma                    | T7451-25 UL | monoclonal (6-11B-1) | Pdot355/800 Goat anti-mouse IgG2b            | 115-005-207 |
| Brain - 405ex  | MBP                        | Myelin Basic Protein                  | Rat                | Abcam                    | ab7349      | monoclonal           | Pdot405/440 Donkey anti-Rat                  | 715-005-151 |
|                | GFAP                       | Glial fibrillary acidic protein       | Mouse IgG1         | Cell Signaling           | 3670S       | monoclonal           | Pdot405/480 Donkey anti-mouse IgG1           | 115-005-205 |
|                | NFH                        | Neurofilament Heavy-chain             | Chicken            | Aves Labs                | NFH         | polyclonal           | Pdot405/515 Goat anti-chicken                | 103-005-155 |
|                | WGA                        | Wheat Germ Agglutinin                 |                    | Vector Labs              | L-1020      |                      | Pdot405/570 WGA                              | -           |
|                | NeuN                       | Neuronal Nuclei                       | Mouse IgG2b        | Encor                    | MCA-1B7     | monoclonal           | Pdot405/605 Goat anti-mouse IgG2b            | 115-005-207 |
|                | AQP4                       | Aquaporin 4                           | Mouse IgG3         | Santa Cruz Biotechnology | sc-32739    | monoclonal           | Pdot405/670 Goat anti-mouse IgG3             | 115-005-209 |
|                | Tuj1/TUBB3                 | Tubulin $\beta$ 3                     | Mouse IgG2a        | BioLegend                | 801201      | monoclonal           | Pdot405/710 Goat anti-mouse IgG2a            | 115-005-206 |
|                | PV                         | Parvalbumin                           | Rabbit             | Abcam                    | ab11427     | polyclonal           | Pdot405/790 Donkey anti-rabbit               | 711-005-152 |
| Kidney - 405ex | CD45                       | Leukocyte Common Antigen              | Rat IgG2b          | BioLegend                | 103101      | monoclonal (30-F11)  | Pdot405/440 Donkey anti-Rat                  | 715-005-151 |
|                | Calb                       | Calbindin                             | Mouse IgG1         | Abcam                    | ab82812     | monoclonal           | Pdot405/480 Donkey anti-mouse IgG1           | 115-005-205 |
|                | PODXL                      | Podocalyxin                           | Goat               | R&D Systems              | AF1556      |                      | Pdot405/515 Goat anti-PODXL                  | -           |
|                | WGA                        | Wheat Germ Agglutinin                 |                    | Vector Labs              | L-1020      |                      | Pdot405/570 WGA                              | -           |
|                | AcTub                      | Acetylated Tubulin                    | Mouse IgG2b        | Sigma                    | T7451-25 UL | monoclonal (6-11B-1) | Pdot405/605 Goat anti-mouse IgG2b            | 115-005-207 |
|                | LEL                        | Lycopersicon Esculentum Tomato Lectin |                    | Vector Labs              | L-1170-2    |                      | Pdot405/670 LEL                              | -           |
|                | $\alpha$ -SMA              | alpha-Smooth Muscle Actin             | Mouse IgG2a        | BioLegend                | 904601      | monoclonal (1A4)     | Pdot405/710 Goat anti-mouse IgG2a            | 115-005-206 |
|                | ColIV                      | Collagen IV                           | Rabbit             | Abcam                    | ab6586      | polyclonal           | Pdot405/790 Donkey anti-rabbit               | 711-005-152 |
| Brain - 488ex  | Tuj1/TUBB3                 | Tubulin $\beta$ 3                     | Mouse IgG2a        | BioLegend                | 801201      | monoclonal           | Pdot488/610-Goat anti-mouse IgG2a            | 115-005-206 |
|                | NeuN                       | Neuronal Nuclei                       | Mouse IgG2b        | Encor                    | MCA-1B7     | monoclonal           | Pdot488/675-Goat anti-mouse IgG2b            | 115-005-207 |
|                | MBP                        | Myelin Basic Protein                  | Rat                | Abcam                    | ab7349      | monoclonal           | Pdot488/805-Donkey anti-Rat                  | 715-005-151 |
| Kidney - 488ex | $\alpha$ -SMA              | alpha-Smooth Muscle Actin             | Mouse IgG2a        | BioLegend                | 904601      | monoclonal (1A4)     | Pdot488/610-Goat anti-mouse IgG2a            | 115-005-206 |
|                | AcTub                      | Acetylated Tubulin                    | Mouse IgG2b        | Sigma                    | T7451-25 UL | monoclonal (6-11B-1) | Pdot488/675-Goat anti-mouse IgG2b            | 115-005-207 |
|                | CD45                       | Leukocyte Common Antigen              | Rat                | BioLegend                | 103101      | monoclonal (30-F11)  | Pdot488/805-Donkey anti-Rat                  | 715-005-151 |

**Table S3. Pdot-primary antibody conjugates.**

| Pdot      | Antibody or Lectin | Protein Target or Lectin                                                 | Performance | Host         | Vendor            | Catalog #         |
|-----------|--------------------|--------------------------------------------------------------------------|-------------|--------------|-------------------|-------------------|
| 355-400   | CD31/PECAM-1       | Cluster of Designation 31, Platelet Endothelial Cell Adhesion Molecule-1 | ++          | Goat         | R&D Systems       | AF3628            |
| 355-400*  | SOX2 (1)           | Sex Determining Region Y-Box 2                                           | +++         | Goat         | Novus Biologicals | AF2018            |
| 355-400   | SOX2 (2)           | Sex Determining Region Y-Box 2                                           | ++          | Mouse IgG1   | Thermo Fisher     | 66411-1-IG        |
| 355-440   | Tuj1/TUBB3         | Tubulin $\beta$ 3                                                        | +           | Mouse IgG2a  | BioLegend         | 801201            |
| 355-440†  | PNA                | Peanut Agglutinin                                                        | +++         | -            | Vector            | L-1070-25         |
| 355-440   | SYNPO              | Synaptopodin                                                             | +           | Rabbit       | Thermo Fisher     | TA890150          |
| 355-515†  | CD13/APN           | Cluster of Designation 13, Aminopeptidase N                              | +++         | Rat IgG2a    | Thermo Fisher     | MA1-33449         |
| 355-515*  | LAMIN A/C (1)      | Lamin A/C                                                                | +++         | Rabbit       | Proteintech       | 10298-1-AP        |
| 355-515   | Podocin (1)        | Podocin                                                                  | +           | Rabbit       | Millipore Sigma   | P0372-200UL       |
| 355-570†  | AQP2               | Aquaporin 2                                                              | +++         | Rabbit       | Novus Biological  | NB110-74682       |
| 355-570*  | MAP2               | Microtubule Associated Protein 2                                         | +++         | Chicken IgGY | Novus Biologicals | NB300-213         |
| 355-610   | AQP4 (1)           | Aquaporin-4                                                              | +           | Rabbit       | Millipore Sigma   | HPA014784-100UL   |
| 355-610   | AQP4 (2)           | Aquaporin-4                                                              | +           | Rabbit       | LSBio             | LS-C150456        |
| 355-610   | Nephrin            | Nephrin                                                                  | +           | Goat         | R&D Systems       | AF3159            |
| 355-610   | CD45               | Cluster of Designation 45, Leukocyte Common Antigen                      | +++         | Rat IgG2b    | BioLegend         | 103102            |
| 355-610†  | ITGA8              | Integrin alpha 8                                                         | +++         | Goat         | Novus Biologicals | AF4076            |
| 355-610   | Podocin (2)        | Podocin                                                                  | +           | Rabbit       | Thermo Fisher     | PA5-37284         |
| 355-670†  | AQP1               | Aquaporin 1                                                              | +++         | Rabbit       | Proteintech       | 20333-1-AP        |
| 355-670   | PNA                | Peanut Agglutinin                                                        | ++          | -            | Vector            | L-1070-5          |
| 355-740*† | VEGFR3             | Vascular Endothelial Growth Factor Receptor 3                            | +++         | Rat          | Novus Biologicals | NB110-61018, 2022 |
| 355-740   | VIM                | Vimentin                                                                 | ++          | IgG2a        | R&D Systems       | MAB21052-100      |
| 355-805   | GAD67              | Glutamate Decarboxylase 1                                                | +           | Rabbit       | LSBio             | LS-C827246-100    |
| 355-805   | CD90/Thy1          | Cluster of Designation 90, Thymus Cell Antigen-1                         | +           | Rat IgG1     | Novus Biologicals | NB100-65543       |
| 355-805†  | UMOD/THP           | Uromodulin, Tamm-Horsfall Protein                                        | +++         | Rat IgG2a    | R&D Systems       | MAB5175           |
| 405-440†  | CD45               | Cluster of Designation 45, Leukocyte Common Antigen                      | +++         | Rat IgG2b    | BioLegend         | 103102            |
| 405-440*  | GFAP               | Glial Fibrillary Acidic Protein                                          | +++         | Chicken IgY  | Thermo Fisher     | PA1-10004         |
| 405-480   | CD31/PECAM-1       | Cluster of Designation 45, Platelet Endothelial Cell Adhesion Molecule-1 | ++          | Goat         | R&D Systems       | AF3628            |
| 405-480†  | Megalyn/LRP2       | Low Density Lipoprotein-related Protein 2                                | +++         | Rabbit       | Invitrogen        | PA5-92032         |
| 405-515   | NFL                | Neurofilament Light Chain                                                | +           | Chicken      | Aves Labs         | NFL               |
| 405-515†  | PODXL              | Podocalyxin                                                              | +++         | Goat         | R&D Systems       | AF1556            |
| 405-570*† | WGA                | Wheat Germ Agglutinin                                                    | +++         | -            | Vector            | L-1020-25         |
| 405-610†  | ColIV              | Collagen IV                                                              | +++         | Rabbit       | Abcam             | ab6586            |
| 405-605*  | NeuN               | Neuronal Nuclei                                                          | +++         | Mouse IgG2b  | BioLegend         | 834501            |
| 405-670†  | LEL                | Lycopersicon Esculentum Tomato Lectin                                    | +++         | -            | Vector            | L-1170-2          |
| 405-670*  | TH                 | Tyrosine Hydroxylase                                                     | ++          | Mouse IgG2a  | BioLegend         | 818001            |
| 405-710†  | Agrin              | Agrin                                                                    | +++         | Goat         | R&D Systems       | AF550             |
| 405-710*  | PV                 | Parvalbumin                                                              | +++         | Rabbit       | Novus Biologicals | NB120-11427       |
| 405-790†  | $\alpha$ -SMA      | alpha-Smooth Muscle Actin                                                | +++         | Mouse IgG2a  | Millipore Sigma   | A5228-200UL       |
| 405-790*  | MBP                | Myelin Basic Protein                                                     | +++         | Mouse IgG2b  | Invitrogen        | MA1-10837         |
| 488-520*† | Calb (1)           | Calbindin                                                                | +++         | Rabbit       | LSBio             | LS-B16562-100     |
| 488-520   | Calb (2)           | Calbindin                                                                | ++          | Mouse IgG1   | Abcam             | ab82812           |
| 488-520   | Calb (3)           | Calbindin                                                                | +           | Chicken      | Novus Biologicals | NBP2-50028        |
| 488-580†  | PDPN               | Podoplanin                                                               | ++          | Goat         | R&D Systems       | AF3244            |

|           |                |                                       |     |             |                   |             |
|-----------|----------------|---------------------------------------|-----|-------------|-------------------|-------------|
| 488-580   | LEL            | Lycopersicon Esculentum Tomato Lectin | +++ | -           | Vector            | L-1170-2    |
| 488-610*  | NFH            | Neurofilament Heavy Chain             | +++ | Chicken IgY | Aves Labs         | NFH         |
| 488-610†  | REN            | Renin                                 | +++ | Goat        | R&D Systems       | AF4277      |
| 488-675†  | AcTub          | Acetylated Tubulin                    | +++ | Mouse IgG2b | Millipore Sigma   | T7451-200UL |
| 488-675*  | Tuj1/TUBB3     | Tubulin $\beta$ 3                     | +++ | Mouse IgG2b | BioLegend         | MMS-435P    |
| 488-765*† | Nes/Nestin (1) | Neuroepithelial stem cell protein     | +++ | Mouse IgG2a | R&D Systems       | MAB2736     |
| 488-765   | Nestin (2)     | Neuroepithelial stem cell protein     | ++  | Mouse IgG1  | Novus Biologicals | NB300-266   |
| 488-765   | SYNPO (1)      | Synaptopodin                          | +   | Rabbit      | Millipore Sigma   | S9442-200UL |
| 488-810   | CK8            | Cytokeratin 8                         | +   | Rabbit      | LSBio             | LS-B7928-50 |
| 488-810   | LMNB1 (1)      | Lamin B1                              | ++  | Mouse IgG1  | Proteintech       | 66095-1-Ig  |
| 488-810†  | PV             | Parvalbumin                           | +++ | Rabbit      | Novus Biologicals | NB120-11427 |

\* labeled are used in brain 14-panel stain

† labeled are used in kidney 21-panel stain

+++ Positive and correct signals in multiple samples

++ Positive and correct signals in some tested samples

+ Images dominated by autofluorescence or exhibiting incorrect non-specific signals in most samples

**Table S4. Optical filters.**

|                             | <b>Chroma</b> | <b>Semrock</b>             |
|-----------------------------|---------------|----------------------------|
| <b>Dichroics (longpass)</b> |               | DI02-R405-25X36            |
|                             |               | DI02-R488-25X36            |
|                             |               | FF376-DI01-25X36           |
|                             |               | zt405/488/561/640rpcv2-UF2 |
| <b>Excitation filters</b>   | zet365/20x    |                            |
|                             | zet405/20x    |                            |
|                             | zet488/10x    |                            |
| <b>Emission filters</b>     | ET405/30m     | FF01-562/40                |
|                             | ET455/50m     | FF01-710/40                |
|                             | ET480/30m     |                            |
|                             | ET519/26m     |                            |
|                             | ET595/44m     |                            |
|                             | ET620/60m     |                            |
|                             | ET667/30m     |                            |
|                             | ET700/75m     |                            |
|                             | ET740/40x     |                            |
|                             | ET760/40      |                            |
|                             | ET800/60      |                            |
